# Supplementary material for: CPAP insufficiency leads to incomplete centrioles that duplicate but fragment
Source: PubMed Central journal article supplement — J Cell Biol. 2022 Apr 11;221(5):e202108018. doi: 10.1083/jcb.202108018 (PMC9007748; doi:10.1083/jcb.202108018), 2022-04-11
Supplement: JCB_202108018_SourceDataFS2.pdf [file JCB_202108018_SourceDataFS2.pdf]

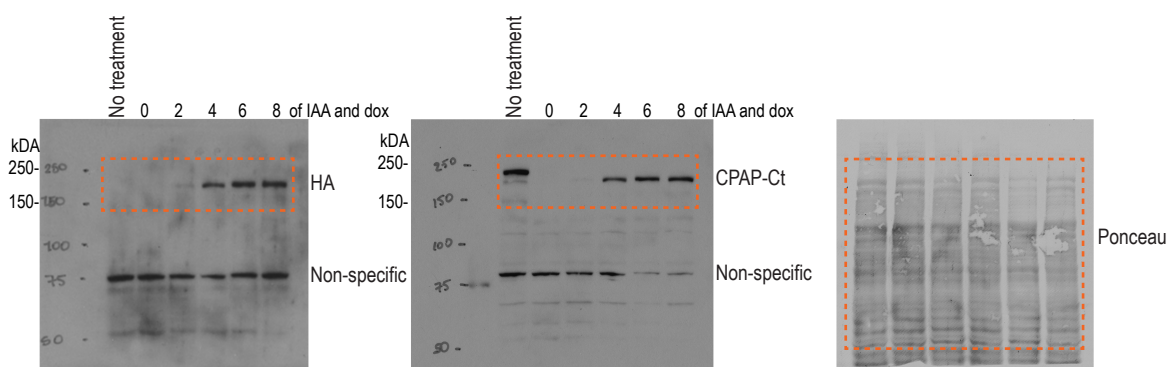

Source data for Fig. S2. Uncropped immunoblots and immunoblot membranes labeled with Ponceau at the end of experiment. The regions cropped and used in Fig. S2 are delineated in orange.
